# Supplementary material for: High strength, self-activating ability and fast adhesion of polyurethane adhesives based on rosin structure in different environments
Source: Royal Society of Chemistry journal article supplement (doi:10.1039/d4mh01292e), 2024-12-09
Supplement: d4mh01292e1.pdf [file d4mh01292e1.pdf]

1

Supplementary Information

2

**High strength, self-activating and fast adhesion of**

3

**polyurethane adhesives based on rosin structure in different**

4

**environments**

5

*Rui Yang*<sup>1</sup>, *Li Tan*<sup>2</sup>, *Zheng Pan*<sup>2</sup>, *Linfeng Tian*<sup>2</sup>, *Tianchen Zhang*<sup>2</sup>, *Baozheng Zhao*<sup>2</sup>,

6

*Fei Song*<sup>2\*</sup>, *Yonghong Zhou*<sup>1,2</sup>, *Meng Zhang*<sup>1,2\*</sup>

7

<sup>1</sup>College of Chemical Engineering, Nanjing Forestry University, Jiangsu Province,

8

Nanjing 210037, PR China.

9

<sup>2</sup>Institute of Chemical Industry of Forest Products, Chinese Academy of Forestry

10

(CAF), Key Lab. of Biomass Energy and Material, Jiangsu Province, Nanjing 210042,

11

PR China.

12

\*Correspondence author: Fei Song ([18770044853@163.com](mailto:18770044853@163.com)) and Meng Zhang

13

([zhangmeng@icifp.cn](mailto:zhangmeng@icifp.cn))

14

## 15 **1. Characterization and Measurements**

### 16 **1.1 Characterization Methods**

17 FT-IR spectra of the DAP were measured on a Nicolet iS50 FT-IR spectrometer  
18 (Madison, WI, USA), with a wavenumber range of 4000-500  $\text{cm}^{-1}$  and a resolution of  
19 4  $\text{cm}^{-1}$ .  $^1\text{H}$  NMR spectra were carried out on a Bruker ARX 300 Wave Spectrometer  
20 (Bruker Instrument Crop, Germany) with deuterated chloroform ( $\text{CDCl}_3$ ) as the solvent  
21 and tetramethylsilane (TMS) as the internal standard. The Differential Scanning  
22 Calorimetry (DSC) was conducted using a DSC8000 (PerkinElmer) at a heating of 20  
23  $^{\circ}\text{C}/\text{min}$  from  $-70^{\circ}\text{C}$  to  $120^{\circ}\text{C}$ . Small Angle X-ray Scattering (SAXS) test was carried  
24 out on polymer films with a thickness of 1 mm and a sample-to-detector distance of  
25 400 mm on a model Xeuss 3.0 instrument. Rheological properties of the adhesive were  
26 characterized by a rheometer (MARS60) with a parallel plate at  $25^{\circ}\text{C}$ . An oscillatory  
27 frequency sweep of the samples was carried out over the frequency range of 0.1 to 100  
28  $\text{rad}/\text{s}$  with a strain amplitude fixed at 1%. The contact angle of water was taken by an  
29 optical instrument goniometer (DSA-100, Kruss) at room temperature, with a drop of  
30 5  $\mu\text{L}$  and readings were taken and photographed after the test drop was stabilized.

### 31 **1.2 Dry/Underwater adhesion $180^{\circ}$ peel test**

32 The peel strength of the adhesive was measured by a universal testing machine  
33 (The UTM6503, Shenzhen Sansi Zongheng Company) at a peel speed of 100  $\text{mm}/\text{min}$   
34 at room temperature. The tests were performed according to the national standard GB/T  
35 2790-1995. The adhesive was first placed on a Kapton film and hot pressed for 30 min  
36 at  $50^{\circ}\text{C}$  under a pressure of 10 MPa in a flatbed vulcanizing machine. The Kapton film  
37 with the adhesive was adhered onto the substrates in the test environment  
38 (dry/underwater) over an area of  $25\text{ mm} \times 100\text{ mm}$ . The adhered samples were allowed  
39 to stand in the test environment (dry/underwater) for 1 h before testing. The adhesion  
40 strengths of the samples were measured under similar conditions in a variety of harsh  
41 environments (1 M NaCl, pH 5, and Seawater). Finally, the end of the Kapton film was  
42 pulled back at  $180^{\circ}$ , mounted in the universal testing machine, and pulled at 100  
43  $\text{mm}/\text{min}$ . The  $180^{\circ}$  peel test procedure is shown in Figure S1 (a). The peel tests were

44 repeated five times, and the results were averaged. To compare the adhesive strength,  
45 a range of different substrates (stainless steel, aluminum sheet, PMMA, and glass) with  
46 dimensions of 80 mm × 25 mm × 2 mm were used. Before the test, the substrates were  
47 sonicated in ethanol and deionized water for 10 min, respectively, and then dried in an  
48 oven at 50°C.

### 49 1.3 Dry/Underwater lap-shear adhesion test

50 Lap-shear strength of the adhesive was measured by a universal testing machine  
51 (The UTM6503, Shenzhen Sansi Zongheng Company) at 100 mm/min at room  
52 temperature. The tests were performed according to the national standard GB/T7124-  
53 2008. Before preparing lap-shear test samples, all of the substrates (stainless steel,  
54 aluminum sheet, PMMA, and glass) were sonicated in ethanol and deionized water for  
55 10 min, respectively, and then dried in an oven at 50°C. The lap-shear test procedure is  
56 shown in Figure S1(b). The adhesive was placed between two substrates with an  
57 overlap area of 15 mm × 25 mm and left in the test environment (dry/underwater) for 1  
58 h. The shear adhesion strengths of the samples in various harsh environments (1 M  
59 NaCl, pH 5, and Seawater) were measured under similar conditions. Finally, the overlap  
60 shear test was performed using a universal testing machine at 25°C at a tensile speed of  
61 100 mm/min. The experiments were repeated five times and the results were averaged.  
62

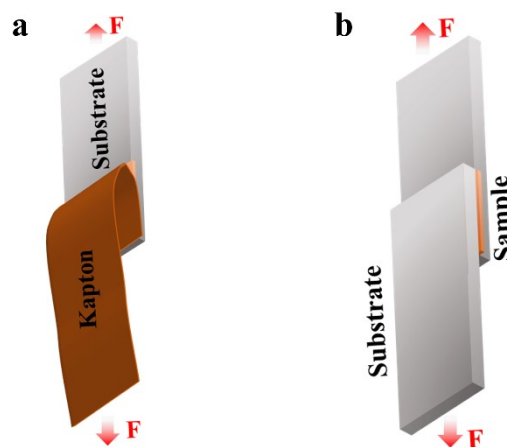

63  
64 Figure S1. (a) Schematic diagram of 180° peeling test for adhesion. (b) Schematic diagram of lap-  
65 shear test for adhesion.

## 66 1.4 Theoretical Simulations

### 67 1.4.1 Density Functional Theory Simulation

68 The Density Functional Theory (DFT) was used to simulate the adsorption of  
69 DAP-PU fragments on iron and glass surfaces, respectively. SiO<sub>2</sub> molecules were used  
70 instead on the glass surface. In this work, all calculations were carried out through the  
71 Vienna Ab initio Simulation Package (VASP) with the projector augmented wave  
72 (PAW) method. The Perdew-Burke-Ernzerhof (PBE) functional with the generalized  
73 gradient approximation (GGA) method was used to do with the exchange-correlation  
74 functional, in combination with the DFT-D3 correction. The cut-off energy of the  
75 plane-wave basis is set at 500 eV. A thickness of 30 Å of vacuum was added for all  
76 surface models. In the calculations, we have used the Brillouin zone integration with  
77 1\*1\*1 Gamma-center point sampling. The self-consistent calculations apply a  
78 convergence energy threshold of 10<sup>-5</sup> eV, and the equilibrium geometries are optimized  
79 with maximum stress on each atom within 0.05 eV/Å. Coulombic interaction (DFT+U)  
80 for Fe with a U-J value is set as 4.3 eV. For the adsorption reaction of molecules, the  
81 energy is calculated through the following equations:

82 **Formula 1:**  $E_{ad} = E_{sur + adsorbate} - E_{sur} - E_{adsorbate}$

83 Where  $E_{sur + adsorbate}$  is the total energy of adsorption model,  $E_{sur}$  is the total  
84 energy of surface and  $E_{adsorbate}$  is the total energy of adsorbate.

### 85 1.4.2 Molecular Dynamics Simulation

86 To study the underwater adhesion mechanism of polymer, the interaction between  
87 DAP-PU and stainless steel or glass substrates can be calculated by the following  
88 Formula 2 for molecular dynamics simulation. Materials Studio software was utilized  
89 to construct the molecular models. DAP-PU was chosen as the simulation object to  
90 construct a molecular chain of DAP: PTMEG-1000: BDO as 8:9:3, and the polymer  
91 consisted of two chains. Stainless steel was replaced by using iron atoms and glass by  
92 using SiO<sub>2</sub> molecules. Each system contains 200 water molecules. The lowest energy  
93 model of DAP-PU was constructed on two different substrates, respectively. The

94 optimized potential of the condensed phase is used in the Atomic Simulation Study  
95 (COMPASS II) force field. The COMPASS II force field is usually used to provide  
96 atomic interactions. Then, the Ewald method and the atom-based method were used to  
97 analyze the Coulomb interaction and Van der Waals (VDW) interaction between the  
98 polymer and the substrate. A geometry optimization using smart method with an energy  
99 convergence criterion of  $1.0 \times 10^{-3}$  kcal·mol<sup>-1</sup> and force convergence criteria of 0.5  
100 kcal·mol<sup>-1</sup>·Å<sup>-1</sup> was used to get a global minimum energy configuration. To equilibrate  
101 the model, a equilibrate process was followed under constant temperature and constant  
102 volume (NVT ensemble) at 298 K for 500 ps. During the simulation, the temperature  
103 control was performed using Nose. The interaction between the adhesive and the iron  
104 or glass substrate was calculated by the following equation:

105 **Formula 2:**  $E_{interfacial} = E_{total} - E_{adhesive} - E_{substrate}$

106 Here, where  $E_{interfacial}$  denotes the interaction energy between the adhesive and  
107 the surface;  $E_{adhesive}$  and  $E_{substrate}$  are the potential energies of the adhesive and the  
108 iron or glass surface, respectively, and  $E_{total}$  represents the total potential energy of the  
109 model system. The larger the negative  $E_{total}$ , the stronger the interaction.

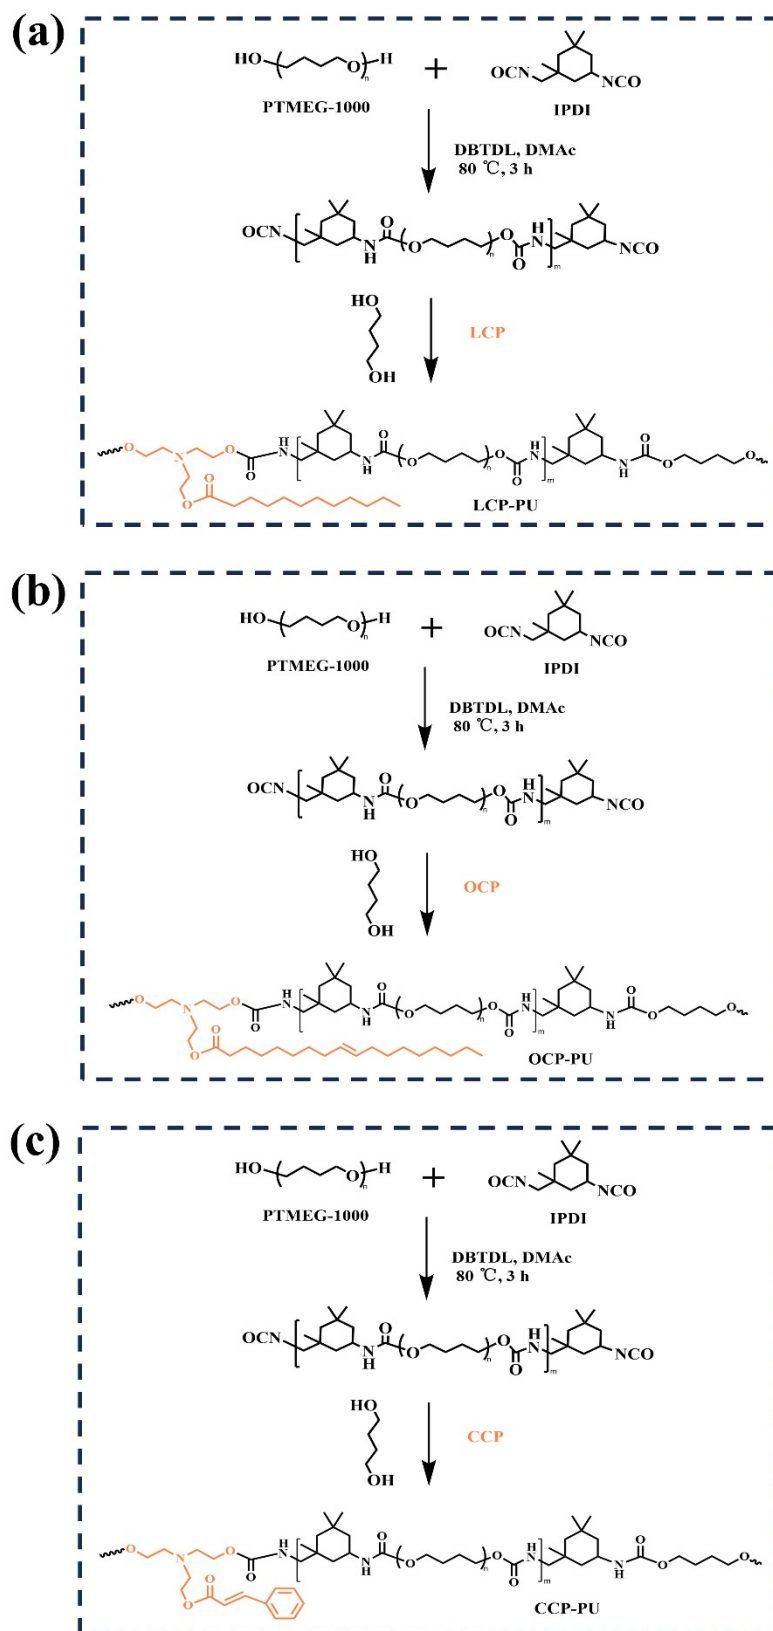

110

111 Figure S2. Synthesis routes of LCP-PU, OCP-PU, and CCP-PU.

112

113 Table S1. Feeding ratios of xDAP-PU adhesion.

| Samples   | PTMEG-1000<br>(mol) | BDO<br>(mol) | DAP<br>(mol) | IPDI<br>(mol) |
|-----------|---------------------|--------------|--------------|---------------|
| 0.3DAP-PU | 0.55                | 0.15         | 0.3          | 1.1           |
| 0.4DAP-PU | 0.45                | 0.15         | 0.4          | 1.1           |
| 0.5DAP-PU | 0.35                | 0.15         | 0.5          | 1.1           |

114

115 Table S2. Feeding ratios of LCP-PU, OCP-PU, and CCP-PU adhesion.

| Sample | PTMEG-1000<br>(mol) | BDO<br>(mol) | Polyol<br>(mol) | IPDI<br>(mol) |
|--------|---------------------|--------------|-----------------|---------------|
| LCP-PU | 0.45                | 0.15         | 0.4 LCP         | 1.1           |
| OCP-PU | 0.45                | 0.15         | 0.4 OCP         | 1.1           |
| CCP-PU | 0.45                | 0.15         | 0.4 CCP         | 1.1           |

116

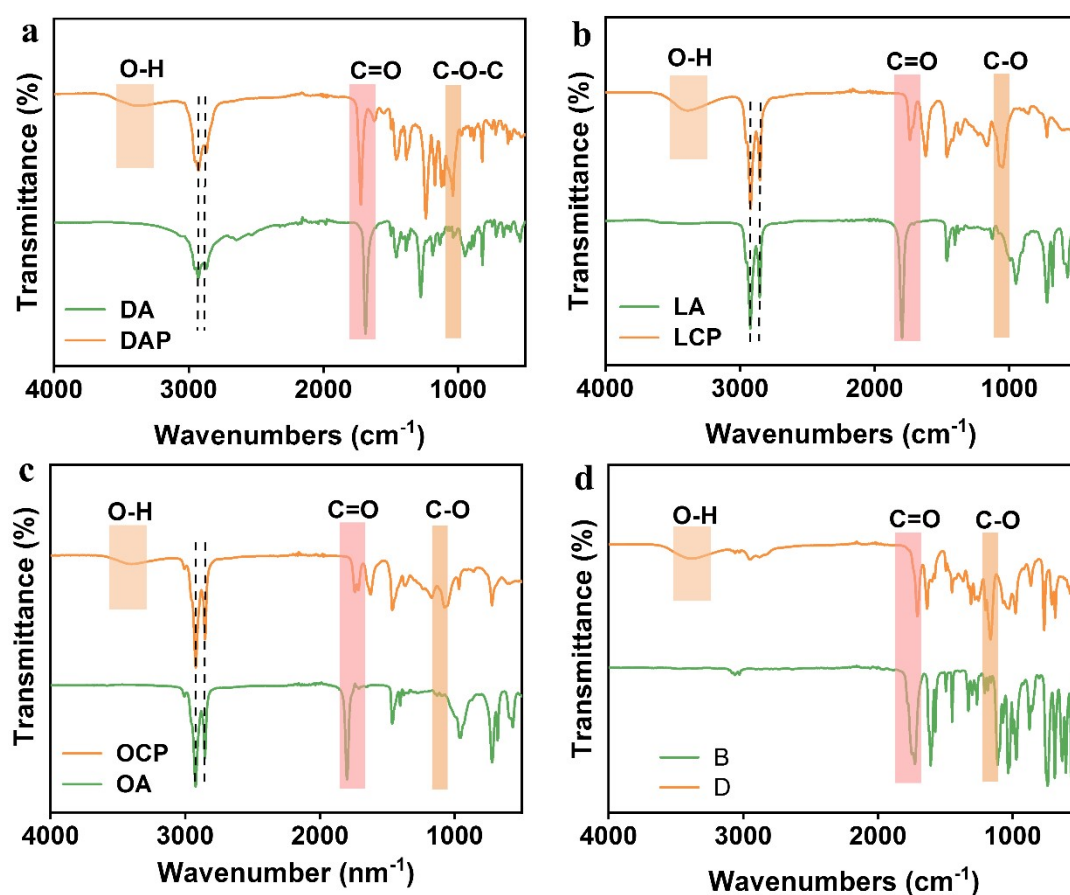

117

118 Figure S3. (a) FT-IR spectra of the DA and the DAP. (b) FT-IR spectra of the LA and the LAP. (c)

119 FT-IR spectra of the OA and the OAP. (d) FT-IR spectra of the CA and the CA.

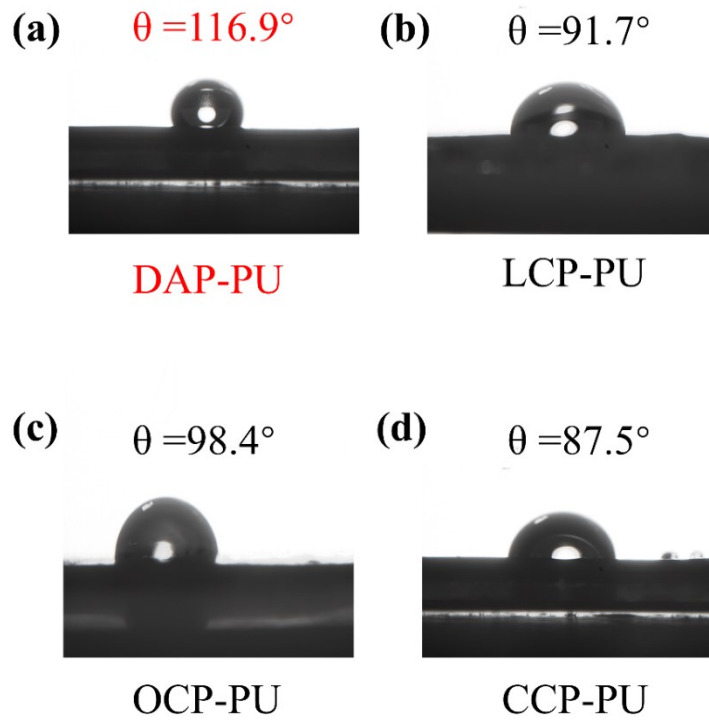

120

121 Figure S4. Water contact angle images of (a) DAP-PU, (b) LCP-PU, (c) OCP-PU, and (d) CCP-

122 PU.

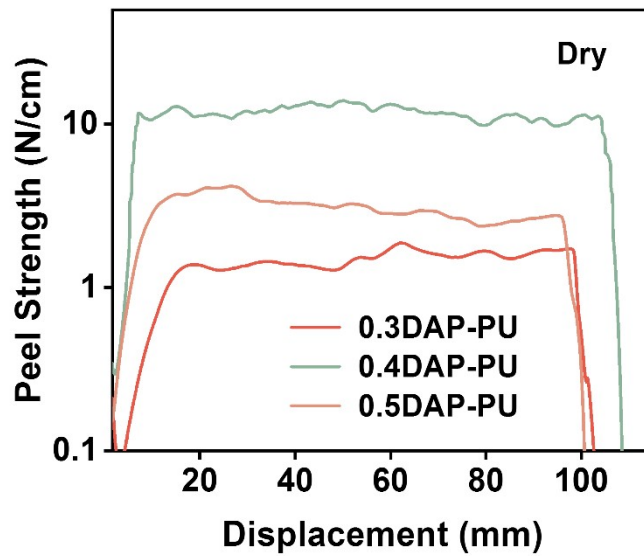

123

124 Figure S5. Dry 180° Peel test curves of 0.3DAP-PU, 0.4DAP-PU, and 0.5DAP-PU.



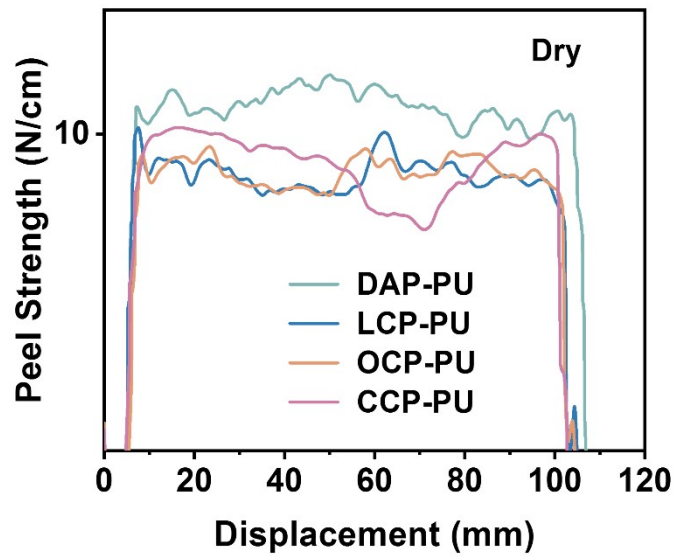

125

126 Figure S6. Dry 180° Peel test curves of DAP-PU, LCP-PU, OCP-PU and CCP-PU.

127

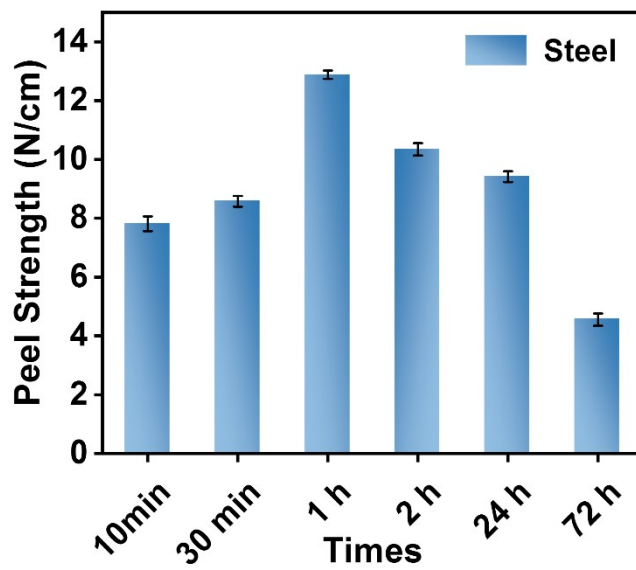

128

129 Figure S7. Underwater 180° peel test curves of DAP-PU on stainless steel substrate at different

130 times.

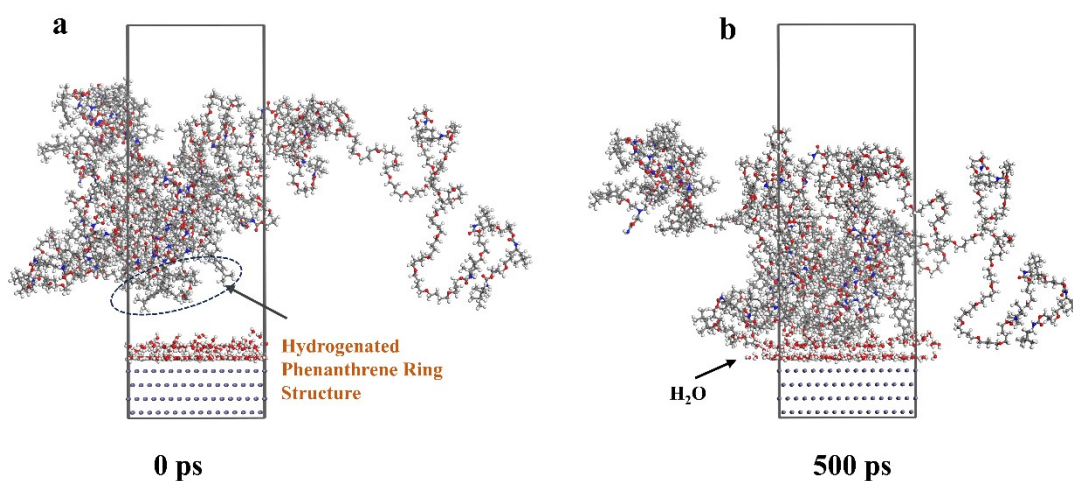

131

132 Figure S8. Conformational diagram of the DAP-PU layer on the iron surface with simulation

133 in the presence of water.

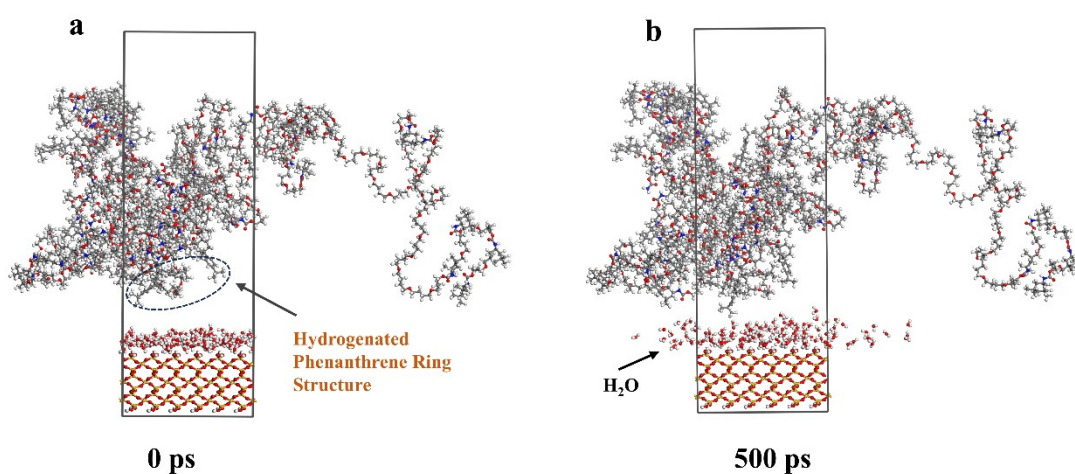

134

135 Figure S9. Conformational diagram of the DAP-PU layer on the glass (SiO<sub>2</sub>) surface with simulation

136 time in the presence of water.

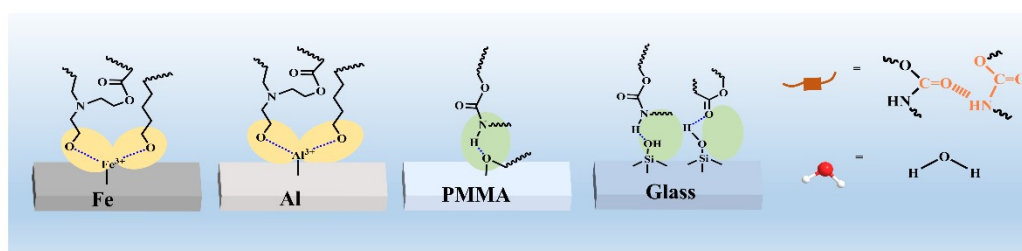

137

138 Figure S10. The schematic diagram of the adhesion of DAP-PU on different substrates.

139 Video S1. DAP-PU adhesive's strong bonding ability to glass dish underwater ◦  
140 Video S2. The bonded stainless steel plate can lifted with a weight of 50 kg and shaken  
141 several times without falling.  
142 Video S3. DAP-PU adhesive immediately and repeatedly adheres to 200 g weights in  
143 underwater environments.
